# Supplementary material for: The Brittle Rachis Trait in Species Belonging to the Triticeae and Its Controlling Genes Btr1 and Btr2
Source: PubMed Central journal article supplement (PMC7387508; doi:10.3389/fpls.2020.01000), 2020-07-22
Supplement: DataSheet_5.pdf [file DataSheet_5.pdf]

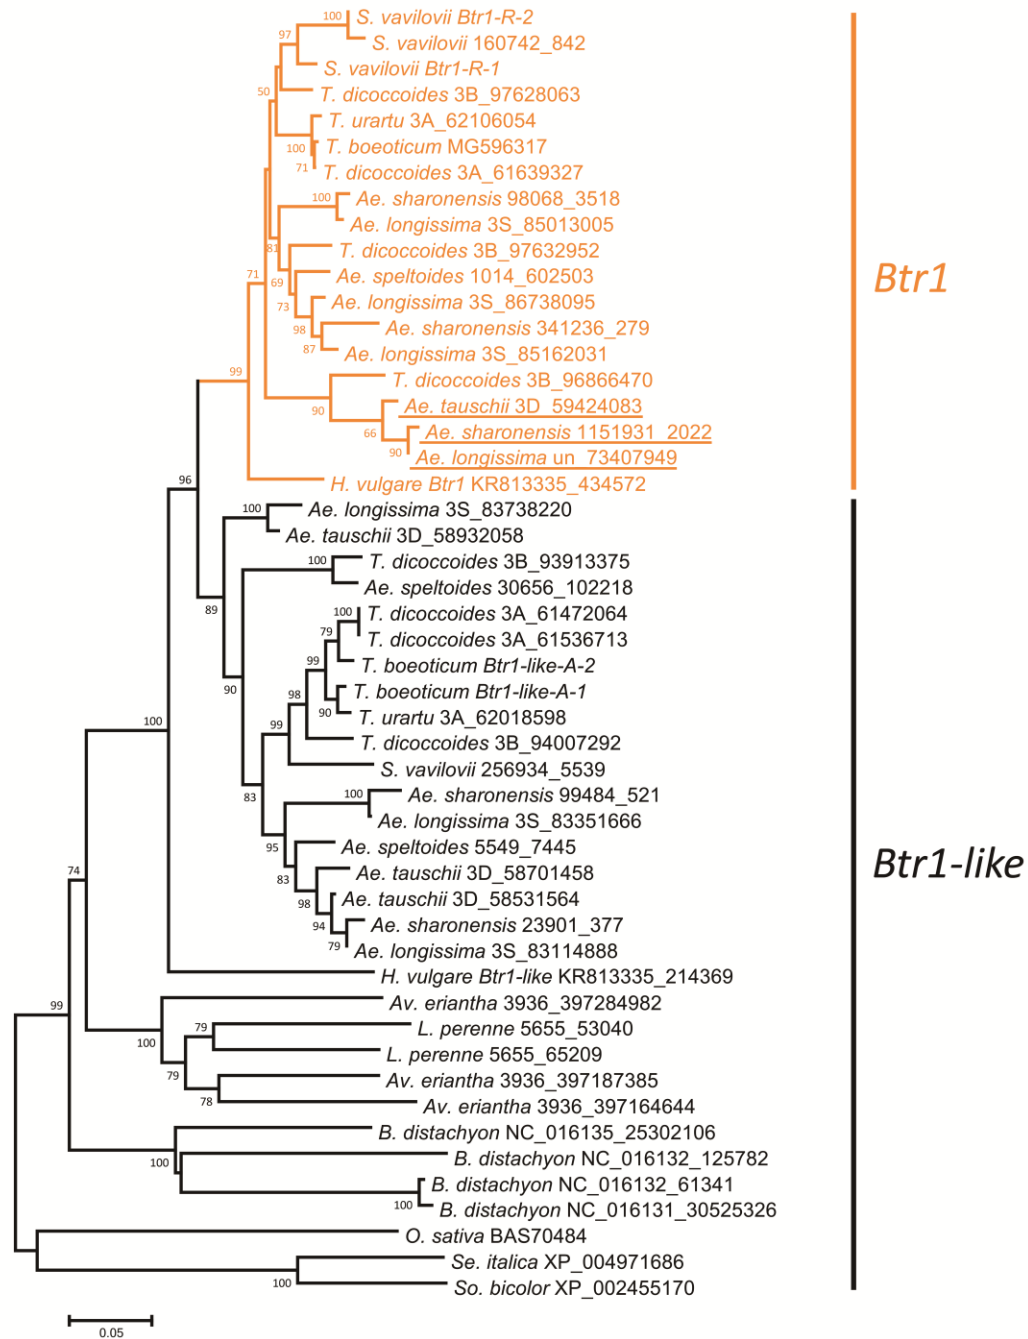

Fig. S1. Phylogenetic analysis of Poaceae *Btr1* and *Btr1-like* genes including those likely non-translated. Members of the *Btr1* clade are colored orange. The truncated *Btr1* copies in *Ae. tauschii* (chromosome 3D: 59424083-59424248) and *Ae. longissima* (un: 73407949-73408115) are shown underlined. Numbers given at a branch node indicate bootstrap probabilities (only those >50% are shown). The number refer to the accession / scaffold / contig and the start location of each gene is given in Table S3.

```

T_boeoticum_Btr1-like-A-1 ATGGCGCAGCCGCCGCATGGAAGGCGATGTACCTGCCTGTGACGAGCGACGCGATCCGA 60
T_boeoticum_Btr1-like-A-2 ATGGCGCAGCCGCCGCATGGAGGACGATGTACCTGTCTGTGACGAGCGAGGCGATCCGA 60
***** * *****
T_boeoticum_Btr1-like-A-1 TCCGCCGCCCGCTCAAGCGAAGCGTCCGCCGCCGCGGTACCGAGCTGGCGTCCCGCGAG 120
T_boeoticum_Btr1-like-A-2 TCCGCCGCCCGCTCAAGCAAAGCGTCCGCCGCCGCGGTACCGAGCTGGCGTCCCGCGC-- 118
***** *****
T_boeoticum_Btr1-like-A-1 GTGGTGTGACACCCGCGACGCCAGGGGCGGTACACCTTGCTGGAGTCCGCGCTGACC 180
T_boeoticum_Btr1-like-A-2 -TGGTGTGACACCCGCGACTCCGAGGGGCGGTACACCTTGCTGGAGTCCGCGCTGACA 177
*****
T_boeoticum_Btr1-like-A-1 CACATCGACCACGCATCCGGTCCCTCTCCGCTTTCATCATCAACATGGTGGTGGCCGAG 240
T_boeoticum_Btr1-like-A-2 CACATCGACCACGCATCCGGTCCCTCTCCGCTTTCATCATCAACACGGTGGTGGCCGAG 237
*****
T_boeoticum_Btr1-like-A-1 CGCCTGACGCTCCACGGCTGCGGGCGCGTCCCGTCCGAGCCGGTGGCCCGCTCGGCGAC 300
T_boeoticum_Btr1-like-A-2 CGCCTGACGCTCCACGGCTGCGGGCGCGTCCCATCGGAGCCGGTGGCCCGCATCGGCGAC 297
*****
T_boeoticum_Btr1-like-A-1 CTCCGCGACGGCCACGGGCGCCACGACGAGTGGCTTGCTCTGATCAGGCTCCAGGCCGCC 360
T_boeoticum_Btr1-like-A-2 CTCCGCGACGGCCACGGGCGCCACGACGAGTGGCTTGCTCTCGTCCAGGCTCCAGGCCGCC 357
*****
T_boeoticum_Btr1-like-A-1 AGGGAGCACGCCAGGACGCGCTCCGCCGAGTGGAGGGGGCCTACACCTCTGGCCACC 420
T_boeoticum_Btr1-like-A-2 AGGGAGCACGCCAGGACGCGCTCCGCCGAGTGGAGGGGGCCTACACCTCTGGGCTCC 417
***** * **
T_boeoticum_Btr1-like-A-1 GTCGGGTTTCATGCTTCACAGCCAGAACCCCGACGCTCCAGGGCGCCGGCAAGCCATGGAA 480
T_boeoticum_Btr1-like-A-2 GTCGGGTTTCATGCTTCACAGCCAGAACCCCGACGCTCCAGGGCGCCGGCAAGCCATGGAA 477
*** *****
T_boeoticum_Btr1-like-A-1 GGGCAGCTCCACGCCCTCGACCTCCAGCCCGTGGTGGTTCGGCGTGGCGAGCATGTCCGCG 540
T_boeoticum_Btr1-like-A-2 GGGCAGCTCCACGCCCTCGATCTCCAGCCCGTGGTGGTTCGGCGTGGCGAGCATGTCCGCG 537
*****
T_boeoticum_Btr1-like-A-1 CTGGCCTCCTTGGCCACCCAGCCCCCATCCGCTACCGCATCCAGTGA 588
T_boeoticum_Btr1-like-A-2 CTGGCCTCCTTGGCCACCCAGCCCCCATCCGCTACCGCATCCAGTGA 585
*****

```

a

```

T_boeoticum_BTR1-LIKE-A-1 MAQPPPWKAMYLPVTSDAIRSAAVKRSVAAARTELASPVVLDTRDAEGRYTLLESALT 60
T_boeoticum_BTR1-LIKE-A-2 MAQPPPWRTMYLSVTSEAIRSAARVKQSVAAARRDLASP-LVLDTRDSEGRYTLLESALT 59
*****:***.***:***** **:***** :**** :*****:*****
T_boeoticum_BTR1-LIKE-A-1 HIDHASGSLSAFIINMVVAERLTLHGCGAVPSEPVARVGDRLRDGHRHDEWLALIRLQAA 120
T_boeoticum_BTR1-LIKE-A-2 HIDHASGSLSAFIINTVVAERLTLHGCGAVPSEPVARIGDLRDGHRHDEWLALVRLQAA 119
***** *****:*****:*****
T_boeoticum_BTR1-LIKE-A-1 REHAQDALRRVEGAYTLLATVGFMLHSQNPDPGRRQAMEGQLHALDLQPVVVGVASMSA 180
T_boeoticum_BTR1-LIKE-A-2 REHAEDALRRVEGAYTLLGSVRFMLHSQNPDPGRRQAMEGQLHALDLQPVVVGVASMSA 179
***:*****.* *****
T_boeoticum_BTR1-LIKE-A-1 LASLATQPPPIRYRIQ 195
T_boeoticum_BTR1-LIKE-A-2 LASLATQPPPIRYRIQ 194
*****

```

b

Fig. S2. Alignment of the products of the *T. boeoticum* genes *Btr1-like-A-1* and *Btr1-like-A-2*.

H\_vulgare\_Btr1\_KR813335:434572-435162 ATGGCGCAGCCGCCCAATGGAAGGCGATGTACCAGTATGTCGCGCAGCGGGCGCACGAC 60  
S\_vavilovii\_Btr1-R-1 ATGGCGCAGCCGCCCAATGGAAGGCGATGTACCAGTACGTGGCGATACGGGCGCACGAC 60  
S\_vavilovii\_contig\_160742:842-1852 ATGGCGCAGCCACCSCAATGGAAGGCGATGTACCAGTACGTGGCGATACGGGCGCACGA 60  
S\_vavilovii\_Btr1-R-2 ATGGCGCAGCCACCSCAATGGAAGGCGATGTACCAGTACGTGGCGATACGGGCGCACGA 60  
\*\*\*\*\*  
H\_vulgare\_Btr1\_KR813335:434572-435162 GGCTGCGCCCGCGTCCAGGAAAGTGTCCGCGACGCGCGCAGGGCGCTGGCGTCCACCGCTG 120  
S\_vavilovii\_Btr1-R-1 GGCTGCGCCCGCGTCCAGGAAAGTGTCCGCGACGCGCGCAGGGCGCTGGCGTCCACCGCTG 120  
S\_vavilovii\_contig\_160742:842-1852 GGCTGCGCCCGCGTCCAGGAAAGTGTCCGCGACGCGCGCAGGGCGCTGGCGTCCACCGCTG 120  
S\_vavilovii\_Btr1-R-2 GGCTGCGCCCGCGTCCAGGAAAGTGTCCGCGACGCGCGCAGGGCGCTGGCGTCCACCGCTG 120  
\*\*\*\*\*  
H\_vulgare\_Btr1\_KR813335:434572-435162 GTGCTGGACACCCCGCAGCCGCGGGGCGGTGCACGTTGCTGCATCCCGGCTGACCCAC 180  
S\_vavilovii\_Btr1-R-1 GTGCTGGACACCCCGCAGCCGCGGGGCGGTGCACCTCCTTGCATCCCGGATGACCCAC 180  
S\_vavilovii\_contig\_160742:842-1852 GTGCTGGACACCCCGCAGCCGCGGGGCGGTGCACCTCCTTGCATCCCGGATGACCCAC 180  
S\_vavilovii\_Btr1-R-2 GTGCTGGACACCCCGCAGCCGCGGGGCGGTGCACCTCCTTGCATCCCGGATGACCCAC 180  
\*\*\*\*\*  
H\_vulgare\_Btr1\_KR813335:434572-435162 GTCGAGCACGCATCCGACTGCCCTCCGGTTTCATAGTCAGCGTGGTGGTGGCGGAGCTC 240  
S\_vavilovii\_Btr1-R-1 GTCGAGCACGCATCCGACTGCCCTCCGGTTTCATATTCAGCATGGTGGTGGCGGAGCTC 240  
S\_vavilovii\_contig\_160742:842-1852 GTCGAGCACGCATCCGACTGCCCTCCGGTTTCATATTCAGCATGGTGGTGGCGGAGCTC 240  
S\_vavilovii\_Btr1-R-2 GTCGAGCACGCATCCGACTGCCCTCCGGTTTCATATTCAGCATGGTGGTGGCGGAGCTC 240  
\*\*\*\*\*  
H\_vulgare\_Btr1\_KR813335:434572-435162 CTGGTGCTCCATGGCTGCGGGGCGCTCCCTTCGAGGCCGTTGGCCAGCATCGCGGCCTC 300  
S\_vavilovii\_Btr1-R-1 CTGGTGCTCCATGGCTGCGGGGCGCTCCCGTTCGAGGCCGTTGGCCAGCATCGCGGCCTC 300  
S\_vavilovii\_contig\_160742:842-1852 CTGGTGCTCCATGGCTGCGGGGCGCTCCCGTTCGAGGCCGTTGGCCAGCATCGCGGCCTC 300  
S\_vavilovii\_Btr1-R-2 CTGGTGCTCCATGGCTGCGGGGCGCTCCCGTTCGAGGCCGTTGGCCAGCATCGCGGCCTC 300  
\*\*\*\*\*  
H\_vulgare\_Btr1\_KR813335:434572-435162 CGCCGCAACCGCAGCAGCAGCAGGAGTGGCTCGCTCTGAGCAGGCTCGAGGCCGCCAGG 360  
S\_vavilovii\_Btr1-R-1 CGCCGCGACCGCAGCAGCAGCAGGAGTGGCTCGCTCTGAGCAGGCTCGAGGCCGCCAGG 360  
S\_vavilovii\_contig\_160742:842-1852 CGCCGCGACCGCAGCAGCAGCAGGAGTGGCTCGCTCTGAGCAGGCTCGAGGCCGCCAGG 360  
S\_vavilovii\_Btr1-R-2 CGCCGCGACCGCAGCAGCAGCAGGAGTGGCTCGCTCTGAGCAGGCTCGAGGCCGCCAGG 360  
\*\*\*\*\*  
H\_vulgare\_Btr1\_KR813335:434572-435162 GAGCAGCGCCAGGACGCGCTCCGCGGAGTGGAGGGGCGCTTACCCTCCTGGCCTCCGTC 420  
S\_vavilovii\_Btr1-R-1 GAGCAGCGCCAGGATGCGCTCCGCGGGGTGGAGGGGCGCTTACCCTCCTGGCCTCCGTC 420  
S\_vavilovii\_contig\_160742:842-1852 GAGCAGCGCCAGGACGCGCTCCGCGGGGTGGAGGGGCGCTTACCCTCCTGGCCTCCGTC 420  
S\_vavilovii\_Btr1-R-2 GAGCAGCGCCAGGACGCGCTCCGCGGGGTGGAGGGGCGCTTACCCTCCTGGCCTCCGTC 420  
\*\*\*\*\*  
H\_vulgare\_Btr1\_KR813335:434572-435162 CGGTTTCATGCTTCGACGCCGACCCCTGACGCGCGCGGGCGCGCAAGCCATGGAAGAG 480  
S\_vavilovii\_Btr1-R-1 CGGTTTCATGCTTCACAGCCGACCCCGCAGCGTCCGCGGGCGCGCAAGCCATGGAAGAG 480  
S\_vavilovii\_contig\_160742:842-1852 CGGTTTCATGCTTCACAGCCGTACCCTGACGCTGCTGGGCGCGCAAGCCATGGAAGAG 480  
S\_vavilovii\_Btr1-R-2 CGGTTTCATGCTTCACAGCCGTACCCTGACGCTGCTGGGCGCGCAAGCCATGGAAGAG 480  
\*\*\*\*\*  
H\_vulgare\_Btr1\_KR813335:434572-435162 CAGCTCCACGCCCGCCGTCGAATTCAGGCCGTTGGTGGGACGCTGGCGAACATGTTC 540  
S\_vavilovii\_Btr1-R-1 CAGCTCCACGCCCGCCGTCGAATTCAGGCCGTTGGTGGGACGCTGGCGAACATGTTC 540  
S\_vavilovii\_contig\_160742:842-1852 CAGCTCCACGCCCGCCGTCGAATTCAGGCCGTTGGTGGGACGCTGGCC----TGTTC 536  
S\_vavilovii\_Btr1-R-2 CAGCTCCACGCCCGCCGTCGAATTCAGGCCGTTGGTGGGACGCTGGCC----TGTTC 536  
\*\*\*\*\*  
H\_vulgare\_Btr1\_KR813335:434572-435162 GCGCTGGCTTCTTGGCCACTCAGCCTGCCATCCGCAACCGCATCCAGTGA----- 591  
S\_vavilovii\_Btr1-R-1 GCGCTGGCTTCTTGGCCACCCAGCCTGCCATCCGCAACCGCTTCCAGTGA----- 591  
S\_vavilovii\_contig\_160742:842-1852 GCGCTGGCTTCTTGGCCACCCAGCCTGCCATCCGCAACCGAATCCAGTGAAGAGTCCCT 596  
S\_vavilovii\_Btr1-R-2 GCGCTGGCTTCTTGGCCACCCAGCCTGCCATCCGCAACCGAATCCAGTGA----- 587  
\*\*\*\*\*  
H\_vulgare\_Btr1\_KR813335:434572-435162 ----- 591  
S\_vavilovii\_Btr1-R-1 ----- 591  
S\_vavilovii\_contig\_160742:842-1852 TGACTTGCTCTGTCTGCACGATCTGCTTTGCTTGATATCGATGGTTCGCGTTGGCTAGGG 656  
S\_vavilovii\_Btr1-R-2 ----- 587  
\*\*\*\*\*  
H\_vulgare\_Btr1\_KR813335:434572-435162 ----- 591  
S\_vavilovii\_Btr1-R-1 ----- 591  
S\_vavilovii\_contig\_160742:842-1852 CTAGCCCATGCATGGTCTATGTGTCGTCGAATTCGAATACGTACTGTTTTCGGTTCTG 716  
S\_vavilovii\_Btr1-R-2 ----- 587  
\*\*\*\*\*  
H\_vulgare\_Btr1\_KR813335:434572-435162 ----- 591  
S\_vavilovii\_Btr1-R-1 ----- 591  
S\_vavilovii\_contig\_160742:842-1852 TTGTTGTTAACTGCAAGGATCTCTATATACCGGGACCTAATTAGATGTATACTTTGATG 776  
S\_vavilovii\_Btr1-R-2 ----- 587

```

H_vulgare_Btr1_KR813335:434572-435162 ----- 591
S_vavilovii_Btr1-R-1 ----- 591
S_vavilovii_contig_160742:842-1852 TTTGTCGATCTGAAATCCGAGAGATATTTGTTGGTAATTTGGCGTGGTTCATCACTTAAT 836
S_vavilovii_Btr1-R-2 ----- 587

H_vulgare_Btr1_KR813335:434572-435162 ----- 591
S_vavilovii_Btr1-R-1 ----- 591
S_vavilovii_contig_160742:842-1852 TACTGTCATGCATGATTGTATGATGATGATGCGTCGATCATGCATGCCTGGGTGGGTTCG 896
S_vavilovii_Btr1-R-2 ----- 587

H_vulgare_Btr1_KR813335:434572-435162 ----- 591
S_vavilovii_Btr1-R-1 ----- 591
S_vavilovii_contig_160742:842-1852 TACGTTAGTTGCAACTTGCAACGTACATTGGCAGTGCTGTTTTCTTTGTGGTGGCATTG 956
S_vavilovii_Btr1-R-2 ----- 587

H_vulgare_Btr1_KR813335:434572-435162 ----- 591
S_vavilovii_Btr1-R-1 ----- 591
S_vavilovii_contig_160742:842-1852 CACTTTGCAGTTGAGATTCAACTATGATCGATCAGCGAGCGATATCGTAGAATAA 1011
S_vavilovii_Btr1-R-2 ----- 587

```

a

```

H_vulgare_BTR1_KR813335:434572-435162 MAQPPQWKAMYQYVARRAHGDCARVEESVAAARGALATPMVLDRDAAGRCTLLHSAVTH 60
S_vavilovii_BTR1-R-1 MAQPPQWKAMYQYVAIRAHGDCARVEESVADARRALASPLVLDTRDAAGRYTSLHSAMTH 60
S_vavilovii_contig_160742:842-1852 MAQPPQWKAMYQYVAIRAHGDCARVQESVADARRALASPLVLDTRDAAGRYTSLHSAMTH 60
*****:***:* ** ***:***** * ***:**

H_vulgare_BTR1_KR813335:434572-435162 VEHASDCLSGFIVSVVVAELLVLHGCGAVPSRPVASIGGLRRNRDDHDEWLALSRLAAR 120
S_vavilovii_BTR1-R-1 VEHASGCLSGVIFSMVVAELLLALHGCGAVPSRPVAGIGDLRRDRDDHDEWLALSRLAAR 120
S_vavilovii_contig_160742:842-1852 VEHASGYLSGVIFSMVVAELLLALHGCGAVPSRPVAGIGDLRRDRDDHDEWLAVSRLEAAR 120
*****.***.*.*:*****.*****.***.***:*****:*****

H_vulgare_BTR1_KR813335:434572-435162 EHQDALRGVEGAFTLLASVRFMLRSRTPDAAGRQAMEEQLHAAAVELQAVVGSVANMS 180
S_vavilovii_BTR1-R-1 EHAQDALRGVEGAFTLLASVRFMLHSRTPDAAGRQAMEEQLHAAAVELQAVVGSVANLS 180
S_vavilovii_contig_160742:842-1852 EHAQDALRGVEGAFTLLASVRFMLHSRTPDAAGRQAMEEQLHAAAVELQAVL-----R 174
**.*:*****.*****:*****:

H_vulgare_BTR1_KR813335:434572-435162 ALAFLATQPAIRNRIQ 196
S_vavilovii_BTR1-R-1 ALAFLATQPAIRNRFQ 196
S_vavilovii_contig_160742:842-1852 F-NYDRSASDIVE--- 186
: . * :

```

b

Fig. S3. The *Btr1* genes present in *S. vavilovii*. (a) Nucleotide alignment between *S\_vavilovii\_contig\_160742*, *Btr1-R-1*, *Btr1-R-2* and barley *Btr1*. Exons in *S\_vavilovii\_contig\_160742* and *Btr1-R-2* are shown boxed. (b) Polypeptide alignment between the products of the *S. vavilovii Btr1* genes and barley *Btr1*.

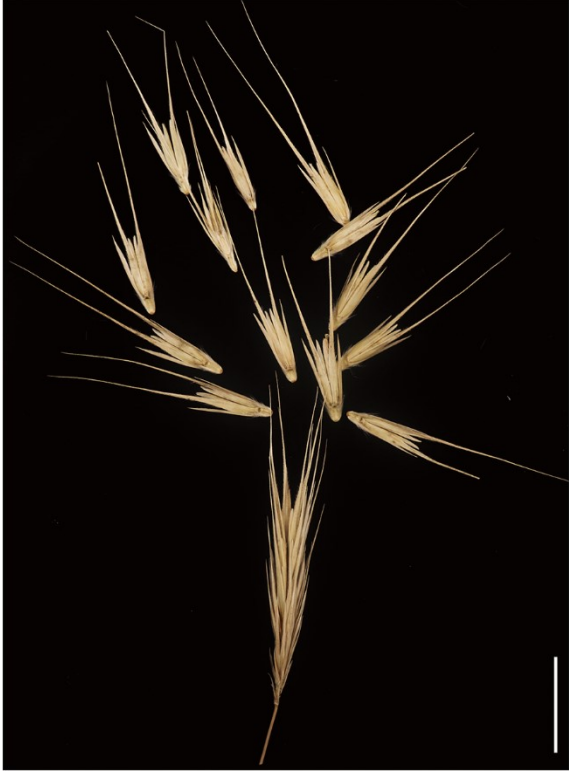

Fig. S4. The mature spike of *S. vavilovii*. Scale bar, 2cm.



H\_vulgare\_Btr1\_KR813335:434572-435162 ATGGCGCAGCCGCGCAATGGAAGGCGATGTACCAGTATGTGCGCGACGGGCGCACGAC 60  
Ae\_sharonensis\_98068:3518-2928 ATGGCGCAGCCGCGCAGTGGAAAGGCGATGTACCAGTATGTGGCGATACGGGCGCACGAC 60  
Ae\_longissima\_3S:86738095-86738685 ATGGCGCAGCCGCGCAGTGGAAAGGCGATGTACCAGTATGTGGCGATACGAGCGCACGAC 60  
Ae\_sharonensis\_1151931:2022-1843 ATGGCGCAGCCGCGCAATGCAAGGCGATGTACGTGTATGTGGCGAGACGGGCGCGCAA 60  
Ae\_longissima\_un:73407949-73408128 ATGGCGCAGCCGCGCAATGCAAGGCGATGTACGTGTATGTGGCGAGACGGGCGCGCAA 60  
Ae\_tauschii\_3D:59424083-59424261 A-GGCGCAGCCGCGCAATGGAAGGCGATGTACGTGTATGTGGCGCGACGGGCGCGCAA 59  
\* \*\*\*\*\* \*\* \*\*\*\*\* \*\*\*\*\* \*\* \* \* \* \* \*

H\_vulgare\_Btr1\_KR813335:434572-435162 GGCTGCGCCCGCTCGAGGAAAGCGTTCGCGCGCGCGGAGCGCTGGCGACCCCGATG 120  
Ae\_sharonensis\_98068:3518-2928 AGCTGCGCCCGAGTGGAGGAAAGTGTGCTGCGCGCGCTAGGGAGCTGGCGTCCCGCGG 120  
Ae\_longissima\_3S:86738095-86738685 GGCTGACCCCGCTTGAGGAAAGTGTGCGCGCGCGCTAGGGAGCTGGCGTCCCGGAG 120  
Ae\_sharonensis\_1151931:2022-1843 GGCTGCTCTCGCTCGAGCAAAGTGTGCGCGCGCGCTACGGTGTGGCGTCCCGGTG 120  
Ae\_longissima\_un:73407949-73408128 GGCTGCTCTCGCTCGAGCAAAGTGTGCGCGCGCGCTACGGTGTGGCGTCCCGGTG 120  
Ae\_tauschii\_3D:59424083-59424261 GGCTGCTCTCGCTCGAGCACAGTGTGCGCGCGCGCTACGGTGTGGCGTCCCGGTG 119  
\*\*\*\*\* \*\* \* \* \* \* \* \* \* \* \* \* \* \* \* \* \* \* \* \* \* \* \* \* \* \* \*

H\_vulgare\_Btr1\_KR813335:434572-435162 GTGCTGGACACCCGCGACGCGCGGGGGCGGTGCACGTTGCTGCATTCCGCGGTGACCCAC 180  
Ae\_sharonensis\_98068:3518-2928 GTGCTGGACACCCGCAACGCGCGGGGGCGGTATGCCTTGTTCGATTCCGCGATGACCCAC 180  
Ae\_longissima\_3S:86738095-86738685 TTGCTGGACACCCGCGACGCGCGGGGGCGGTACACCTTGTTCGATTCCGCGATGACCCAC 180  
Ae\_sharonensis\_1151931:2022-1843 GTGCTGGACACCCGCAACGCGCGGGGGCGGTACACCTTGTTCGATTCTACTTGGATATGA 180  
Ae\_longissima\_un:73407949-73408128 GTGCTGGACACCCGCAACGCGCGGGGGCGGTACACCTTGTTCGATTCTACTTGGATATGA 180  
Ae\_tauschii\_3D:59424083-59424261 GTGCTGGACACCCGCAACGCGCGGGGGCGGTACACCTTGTTCGATTCTACTTGGATATGA 179  
\*\*\*\*\* \*\* \* \* \* \* \* \* \* \* \* \* \* \* \* \* \* \* \* \* \* \* \* \* \* \* \*

H\_vulgare\_Btr1\_KR813335:434572-435162 GTCGAGCAGCATCCGACTGCCTCTCCGGTTTCATAGTCAGCGTGGTGGTGGCGGAGCTC 240  
Ae\_sharonensis\_98068:3518-2928 GTCGAGCAGCATCCGGCTGCCTCTCCGGTGTATTCAGCATGGGGGTGGCCGAGCAA 240  
Ae\_longissima\_3S:86738095-86738685 GTCGAGCAGCATCCGGCTGCCTCTCCGGTGGCGTATTCAGCATGGGGGTGGCCGAGCTC 240  
Ae\_sharonensis\_1151931:2022-1843 ----- 180  
Ae\_longissima\_un:73407949-73408128 ----- 180  
Ae\_tauschii\_3D:59424083-59424261 ----- 179

H\_vulgare\_Btr1\_KR813335:434572-435162 CTGGTGTCCATGGCTGCGGGGCGCTCCCTTCGAGGCCGGTGGCCAGCATCGCGGCCTC 300  
Ae\_sharonensis\_98068:3518-2928 CTGGCGCTCTATGGCTGCGGGGCGCTCCCTTCGAGGCCGGTGGCCAGCATCGCGGCCTC 300  
Ae\_longissima\_3S:86738095-86738685 CTGGCGCTCCATGGCTGCGGGGCGCTCCCTTCGAGGCCGGTGGCCAGCATCGCGGCCTC 300  
Ae\_sharonensis\_1151931:2022-1843 ----- 180  
Ae\_longissima\_un:73407949-73408128 ----- 180  
Ae\_tauschii\_3D:59424083-59424261 ----- 179

H\_vulgare\_Btr1\_KR813335:434572-435162 CGCCGCAACCCGCGACGACCACGACGAGTGGCTCGCTCTGAGCAGGCTCGAGGCCGCCAGG 360  
Ae\_sharonensis\_98068:3518-2928 CGCCGCGACCCGCGGCGACCACGATGAGTGGCTCGCTCTGAGCAGGCTCGAGGCCGCCAGG 360  
Ae\_longissima\_3S:86738095-86738685 CGCCGCGACCCGCGACGACCACGACGAGTGGCTCGCTCTGAGCAGGCTCGAGGCCGCCAGG 360  
Ae\_sharonensis\_1151931:2022-1843 ----- 180  
Ae\_longissima\_un:73407949-73408128 ----- 180  
Ae\_tauschii\_3D:59424083-59424261 ----- 179

H\_vulgare\_Btr1\_KR813335:434572-435162 GAGCACGCCAGGACGCGCTCCGCGGAGTGGAGGGGGCTTCACCCTCTGGCTCCGTC 420  
Ae\_sharonensis\_98068:3518-2928 GAGCACGCCAGGACGCGCTCCCGGGTGGAGGGGGCTTCACCCTCTGGCTCCGTC 420  
Ae\_longissima\_3S:86738095-86738685 GAGCACGCCAGGACGCGCTCCGCGGGTGGAGAGGGCTTCACCCTCTGGCATCCGTC 420  
Ae\_sharonensis\_1151931:2022-1843 ----- 180  
Ae\_longissima\_un:73407949-73408128 ----- 180  
Ae\_tauschii\_3D:59424083-59424261 ----- 179

H\_vulgare\_Btr1\_KR813335:434572-435162 CGGTTTCATGCTTCGAGCCGGACCCCTGACGCCGCGGGCGCCGCAAGCCATGGAAGAG 480  
Ae\_sharonensis\_98068:3518-2928 CGGTTCTGCTTCACAGCCGAGCCCTGACGCTGCCGCGCCGCGCAAGCCATGGAAGAG 480  
Ae\_longissima\_3S:86738095-86738685 CGGTTCTGCTTCACAGCCGACCCCGACGCTGCCGCGCGCCGCAAGCCATGGAAGAG 480  
Ae\_sharonensis\_1151931:2022-1843 ----- 180  
Ae\_longissima\_un:73407949-73408128 ----- 180  
Ae\_tauschii\_3D:59424083-59424261 ----- 179

H\_vulgare\_Btr1\_KR813335:434572-435162 CAGCTCCACGCCCGCCGCTCGAACTTCAGGCCGTGGTGGGCAGCGTGGCCAACATGTCC 540  
Ae\_sharonensis\_98068:3518-2928 CAGCTCCACGCCCGCCACCGACGAACTTCAGGCCGTGGTGGGCAGCGTGGCCAACATGTCC 540  
Ae\_longissima\_3S:86738095-86738685 CAGCTCCACGCCCGCCGCTCGAACTTCAGGCCCGGTAGGCAGCGTGGCCAACATGTCC 540  
Ae\_sharonensis\_1151931:2022-1843 ----- 180  
Ae\_longissima\_un:73407949-73408128 ----- 180  
Ae\_tauschii\_3D:59424083-59424261 ----- 179

H\_vulgare\_Btr1\_KR813335:434572-435162 GCGCTGGCTTCTTGCCACTCAGCCTGCCATCCGCAACCGCATCCAGTGA 591  
Ae\_sharonensis\_98068:3518-2928 GCGCTGGCTTCTTGCCACCCAGCCTGCCATCCGCAACCGCATCCAGTGA 591  
Ae\_longissima\_3S:86738095-86738685 GCGCTGGCTTCTTGCCACCCAGCCTGCCATCCGCAACCGCATCCAGTGA 591  
Ae\_sharonensis\_1151931:2022-1843 ----- 180  
Ae\_longissima\_un:73407949-73408128 ----- 180  
Ae\_tauschii\_3D:59424083-59424261 ----- 179

|                                       |                                                                 |     |
|---------------------------------------|-----------------------------------------------------------------|-----|
| H_vulgare_BTR1_KR813335:434572-435162 | MAQPPQWKAMYQYVARRAHDGSCARVEESVAAAARGALATPMVLDTRDAAGRCTLLHSVAVTH | 60  |
| Ae_sharonensis_98068:3518-2928        | MAQPPQWKAMYQYVAIRAHDSCARVEESVAAAARRELASPRVLDTRNAAGRYALLHSAMTH   | 60  |
| Ae_longissima_3S:86738095-86738685    | MAQPPQWKAMYQYVAIRAHDGCTRVEESVAAAARRVLASPELLDTRDAAGRYTLLHSAMTH   | 60  |
| Ae_sharonensis_1151931:2022-1843      | MAQPPQCKAMYVYVARRAREGCSRVEQSVAAARTVLASPLVLDTRNAAGRYTLLHST---    | 57  |
| Ae_longissima_un:73407949-73408128    | MAQPPQCKAMYVYVARRAREGCSRVEQSVAAARTVLASPLVLDTRNAAGRYTLLHST---    | 57  |
|                                       | ***** ** ** ** *::.*:***:***** **:* :***:*** :***:              |     |
| H_vulgare_BTR1_KR813335:434572-435162 | VEHASDCLSGFIVSVVVAEELLVLHGCGAVPSRPVASIGGLRRNRDDHDEWLALSRLEAAR   | 120 |
| Ae_sharonensis_98068:3518-2928        | VEHASGCLSGVIFSMGVAEQLALYGCAGVPSRPVAGIGDLRRDRGDHDEWLALSRLEAAR    | 120 |
| Ae_longissima_3S:86738095-86738685    | VEHASGCLSGGVFSGMVAEELLALHGCGAVPSRPVAGIGDLRRDRDDHDEWLALSRLEAAR   | 120 |
| Ae_sharonensis_1151931:2022-1843      | -----WI-----                                                    | 59  |
| Ae_longissima_un:73407949-73408128    | -----WI-----                                                    | 59  |
|                                       | *:                                                              |     |
| H_vulgare_BTR1_KR813335:434572-435162 | EHGQDALRGVEGAFTLLASVRFMLRSRTPDAAGRRQAMEEQLHAAAVELQAVVGSVANMS    | 180 |
| Ae_sharonensis_98068:3518-2928        | EHAQDALPGVEGAFTLLASVRFLLHSRSPDAAGRRQAIIEEQLHAATDELQAVVGSVANMS   | 180 |
| Ae_longissima_3S:86738095-86738685    | EHAQDALRGVERAFTLLASVRFLLHSRTPDAAGRRQAMEEQLHAAGVELQAAVGSVANMS    | 180 |
| Ae_sharonensis_1151931:2022-1843      | -----                                                           | 59  |
| Ae_longissima_un:73407949-73408128    | -----                                                           | 59  |
| H_vulgare_BTR1_KR813335:434572-435162 | ALAFLATQPAIRNRIQ                                                | 196 |
| Ae_sharonensis_98068:3518-2928        | ALAFLATQPAIRNRIQ                                                | 196 |
| Ae_longissima_3S:86738095-86738685    | ALAFMATQPAIRNRIQ                                                | 196 |
| Ae_sharonensis_1151931:2022-1843      | -----                                                           | 59  |
| Ae_longissima_un:73407949-73408128    | -----                                                           | 59  |

b

Fig. S6. The truncated *Btr1* genes present in *Ae. tauschii*, *Ae. longissima* and *Ae. sharonensis*. (a) Nucleotide alignment between the truncated *Ae. tauschii Btr1* (*Ae\_tauschii\_3D*: 59424083-59424261), *Ae. longissima Btr1* (*Ae\_longissima\_3S*: 86738095-86738685), a truncated *Ae. longissima Btr1* (*Ae\_longissima\_un*: 73407949-73408128), *Ae. sharonensis Btr1* (*Ae\_sharonensis\_98068*: 3518-2928), a truncated *Ae. sharonensis Btr1* (*Ae\_sharonensis\_1151931*: 2022-1843) and barley *Btr1*. The putative stop codon in the *Btr1* sequence is marked in bold. (b) Polypeptide alignment between the products of the *Aegilops* spp. *Btr1* genes and barley *Btr1*.



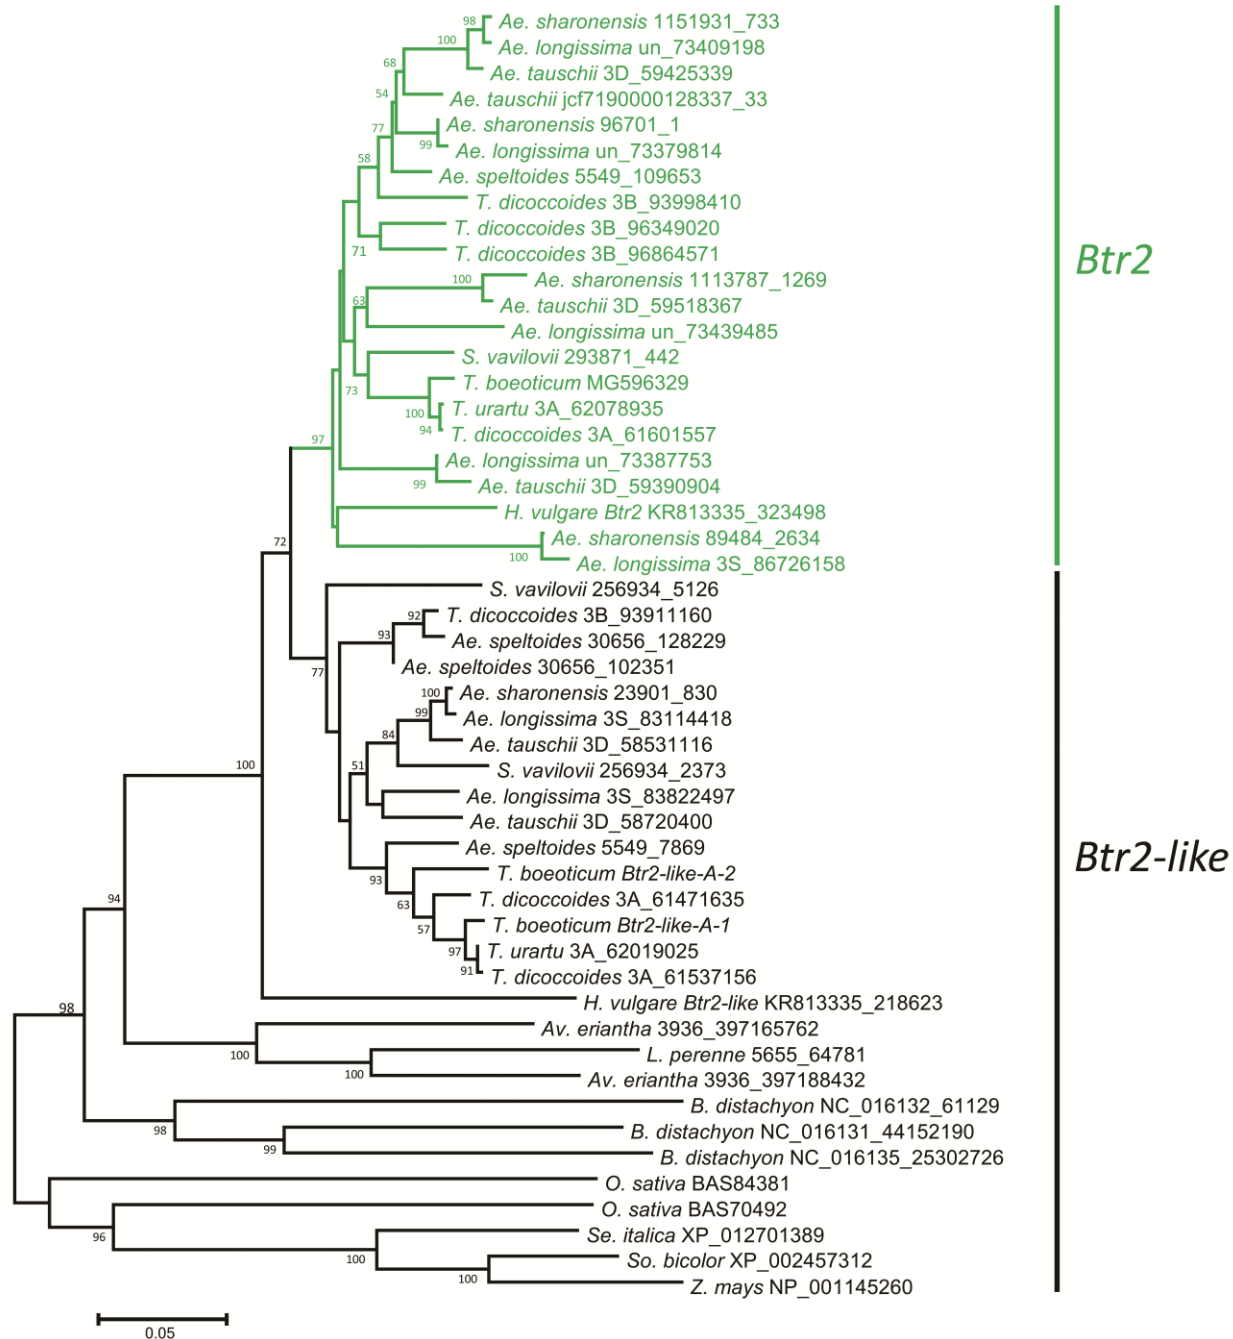

Fig. S7. Phylogenetic analysis of *Poaceae* *Btr2* and *Btr2-like* genes including those likely non-translated. Members of the *Btr2* clade are colored green. Numbers given at a branch node indicate bootstrap probabilities (only those >50% are shown). The number refer to the accession / scaffold / contig and the start location of each gene is given in Table S6.

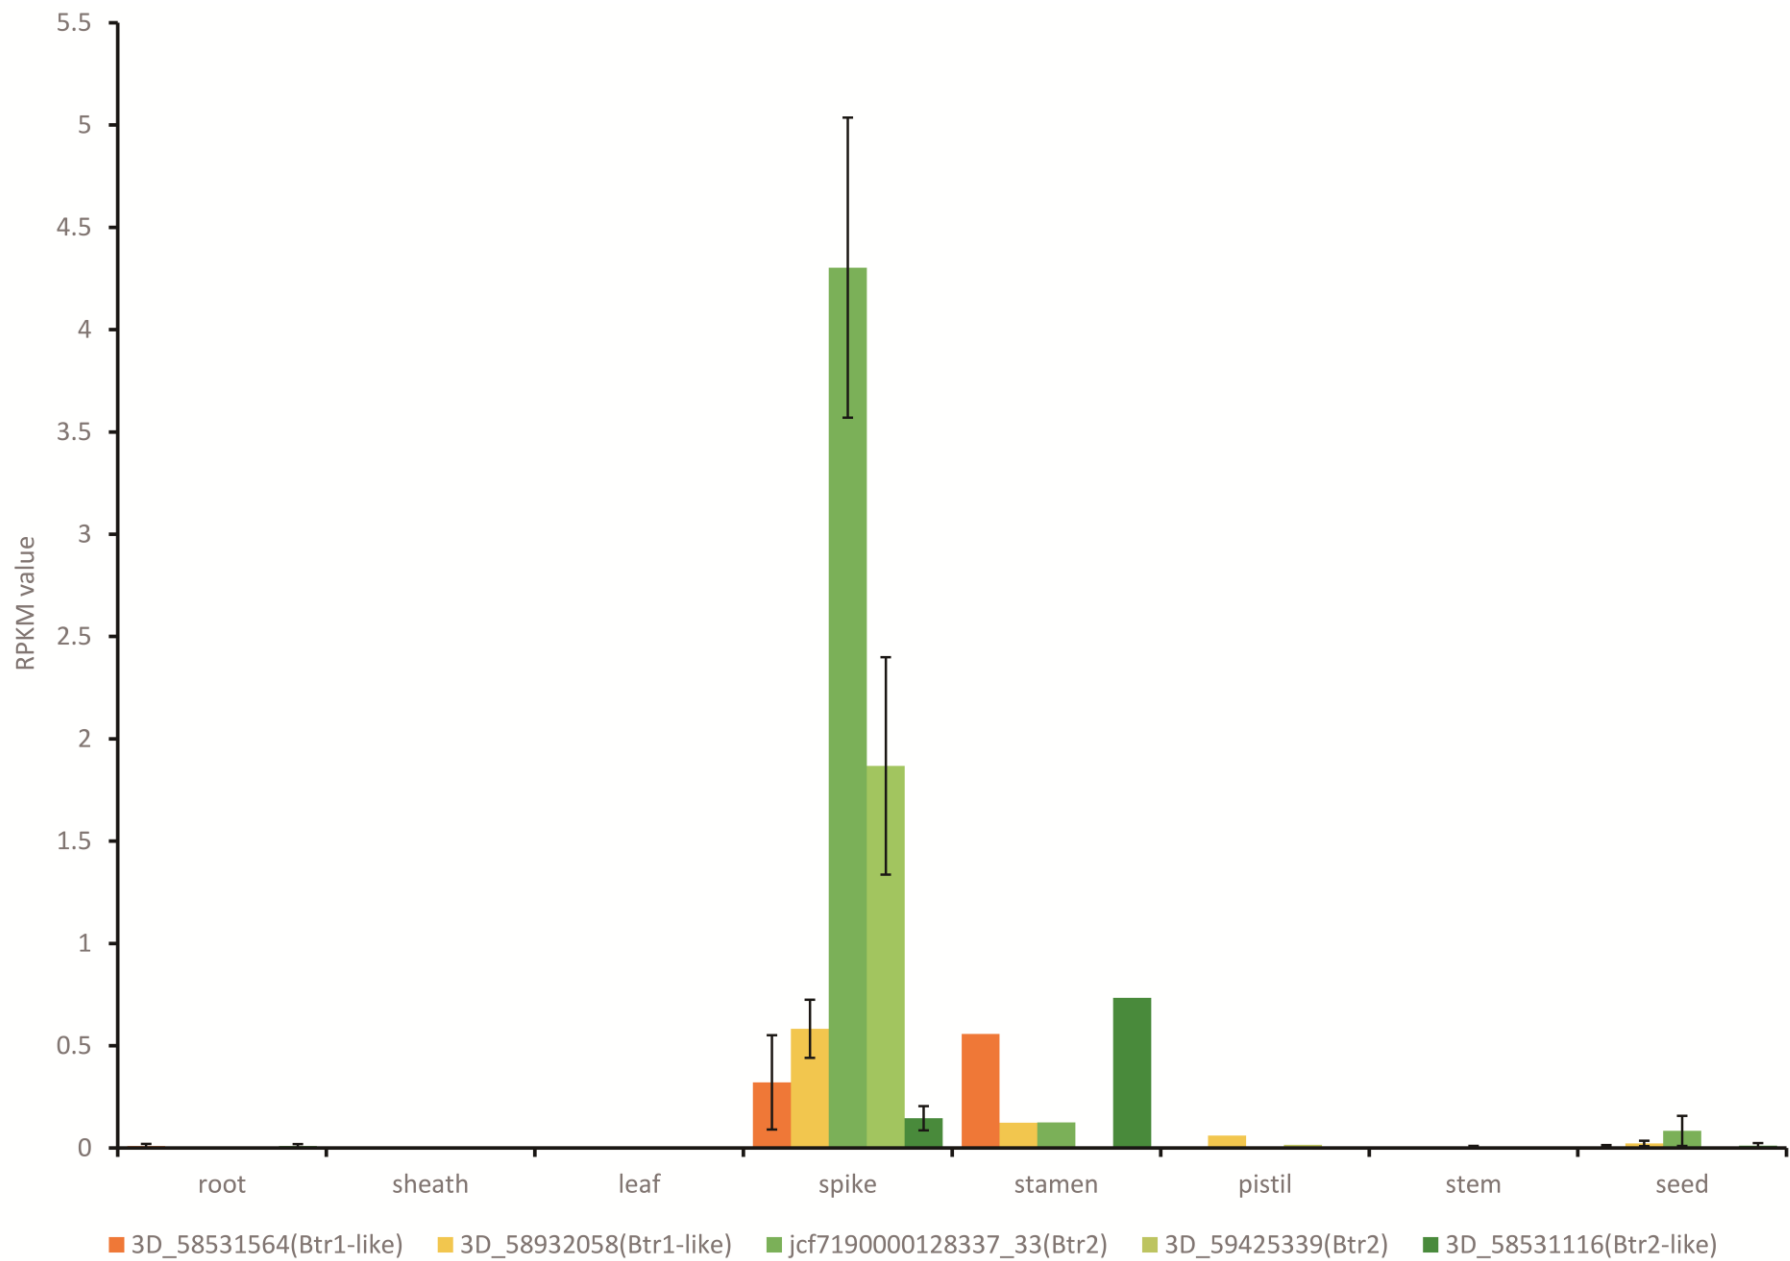

Fig. S8. RNA-seq derived transcript abundances (expressed as RPKM) of the *Ae. tauschii* *Btr* genes across various parts of the plant. The error bar indicates the SE ( $n=2$  or 3).

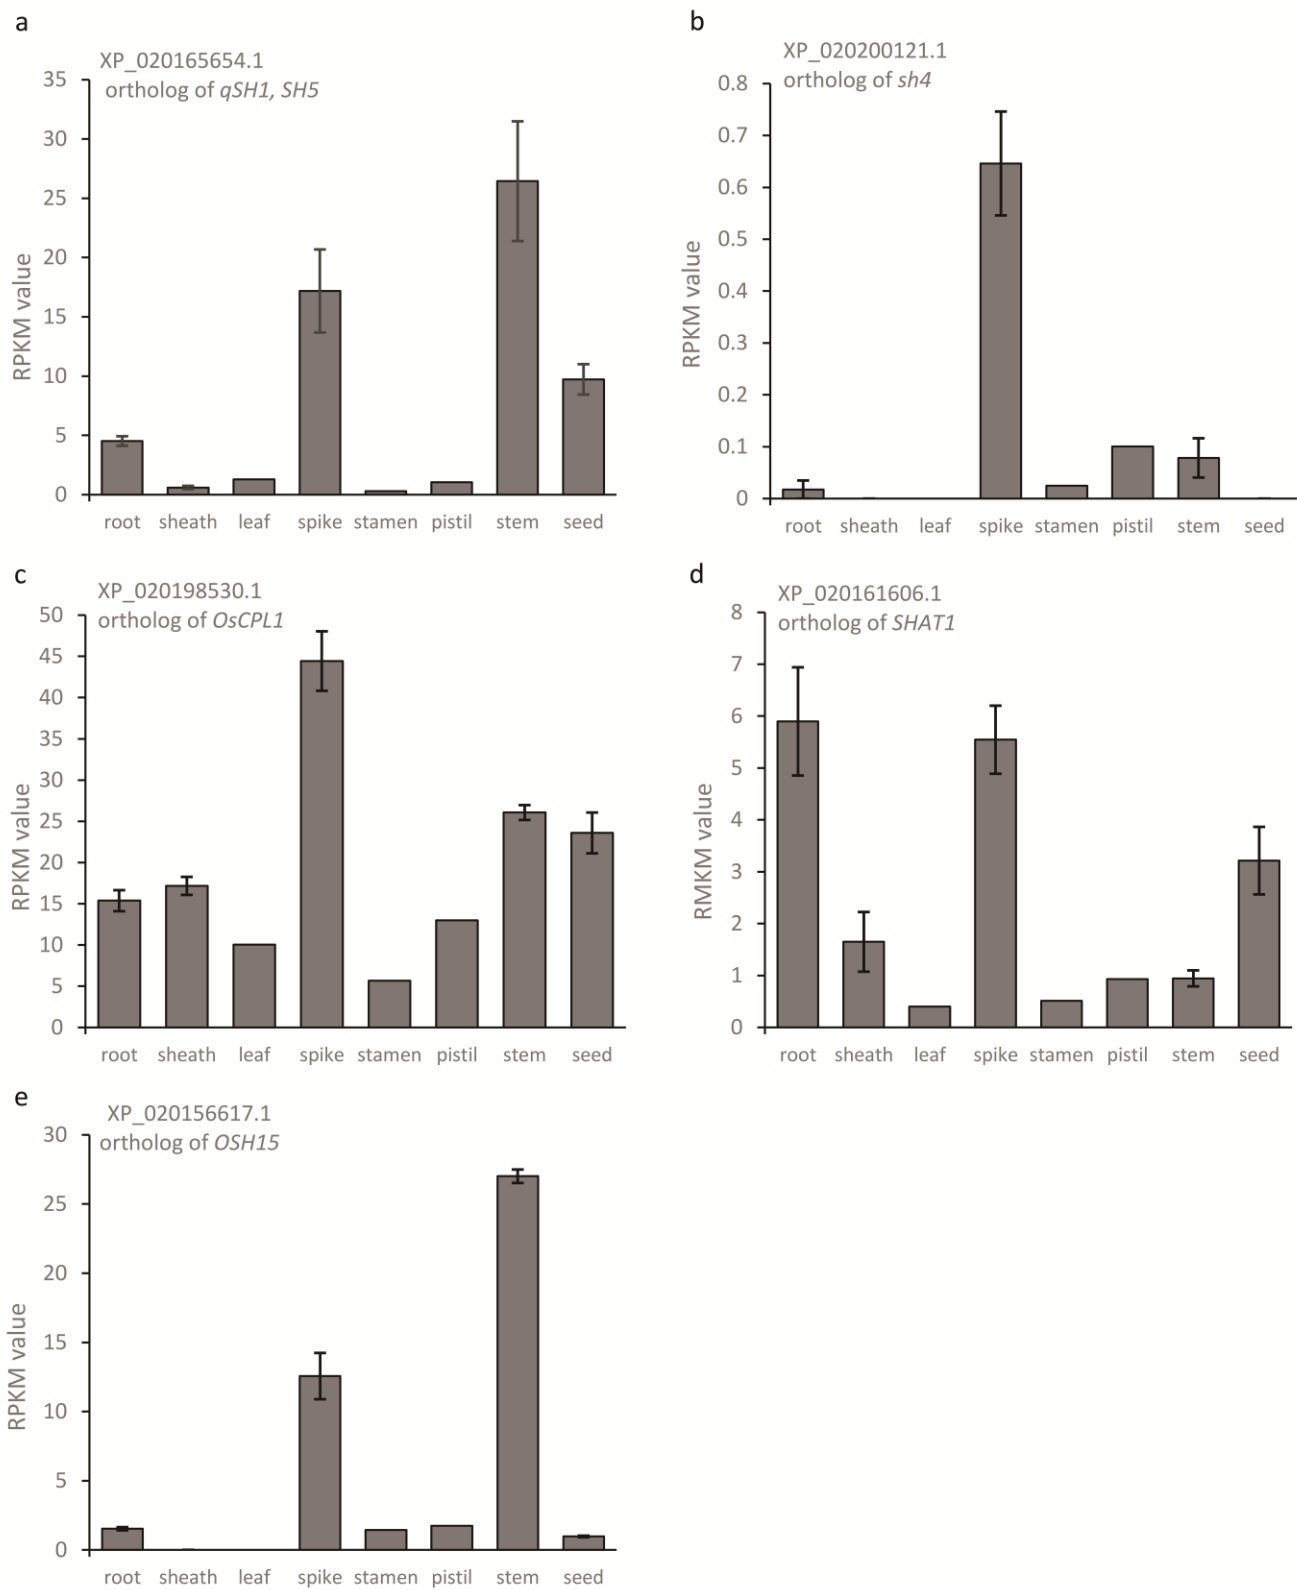

Fig. S9. RNA-seq derived transcript abundances (expressed as RPKM) of the *Ae. tauschii* orthologs of genes implicated in shattering in rice across various parts of the plant. (a) XP\_020165654.1, the ortholog of *qSH1* and *SH5*, (b) XP\_020200121.1, the ortholog of *sh4*, (c) XP\_020198530.1, the ortholog of *OsCPL1*, (d) XP\_020161606.1, the ortholog of *SHAT1*, (e) XP\_020156617.1, the ortholog of *OSH15*. The error bar indicates the SE ( $n=2$  or  $3$ ).
